# Supplementary material for: L-Cysteine Modified Chitosan Nanoparticles and Carbon-Based Nanostructures for the Intranasal Delivery of Galantamine
Source: Polymers (Basel). 2022 Sep 24;14(19):4004. doi: 10.3390/polym14194004 (PMC9571213; doi:10.3390/polym14194004)
Supplement: Supplementary file 1 [file polymers-14-04004-s001.zip › polymers-1922588-supplementary.pdf]

## Supplementary Material

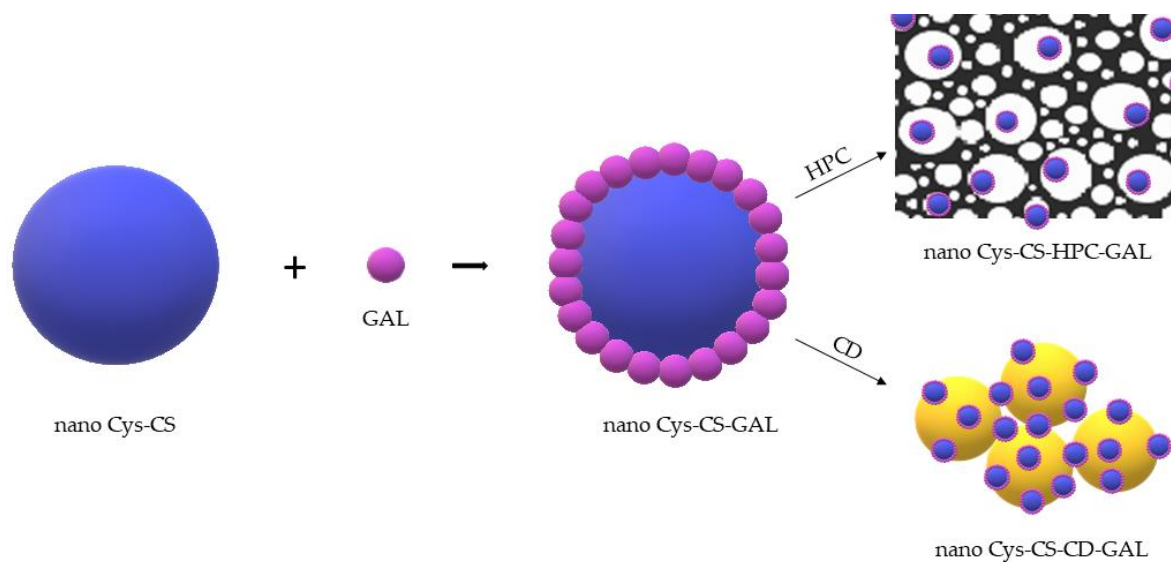

**Figure S1:** Schematic representation of the entire NPs' design

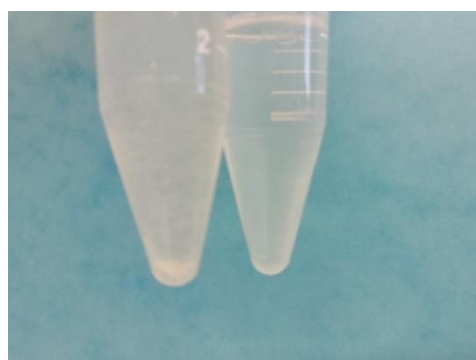

CS and Cys-CS at 25°C

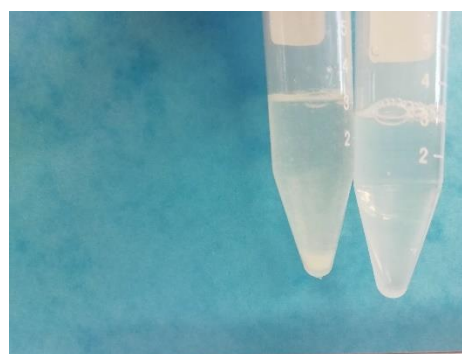

CS and Cys-CS at 37°C

**Figure S2:** Pictures of the CS precipitation and the improved solubility of Cys-CS at alkaline pH (pH = 7.4).

**Table S1:** Standards' concentration and calculated area for the HPLC method for the determination of Galantamine.

| SAMPLE   | CONCENTRATION<br>(PPM) | AREA<br>(RT 4.58MIN) |
|----------|------------------------|----------------------|
| STD_0.01 | 0.01                   | 308                  |
| STD_0.05 | 0.05                   | 1333                 |
| STD_0.1  | 0.1                    | 2962                 |
| STD_0.5  | 0.5                    | 14686                |
| STD_1    | 1                      | 25227                |
| STD_2.5  | 2.5                    | 55220                |
| STD_5    | 5                      | 123590               |
| STD_10   | 10                     | 259840               |
| STD_20   | 20                     | 471632               |
| STD_50   | 50                     | 1170996              |

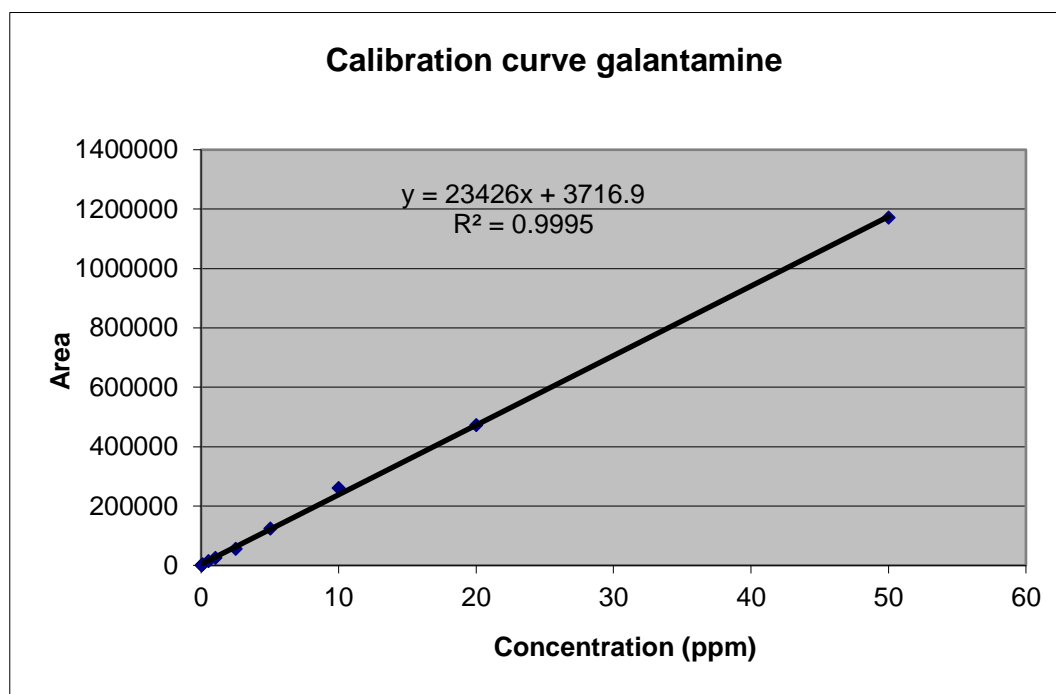

**Figure S3.** Calibration curve for the HPLC method used to determine galantamine's content.
